# Supplementary material for: Molecular association of glucose-6-phosphate isomerase and pyruvate kinase M2 with glyceraldehyde-3-phosphate dehydrogenase in cancer cells
Source: BMC Cancer. 2016 Feb 24;16:152. doi: 10.1186/s12885-016-2172-x (PMC4766697; doi:10.1186/s12885-016-2172-x)
Supplement: Supplementary file 1 — Supplementary material. (PDF 623 kb) [file 12885_2016_2172_MOESM1_ESM.pdf]

## Supplementary Material

### *Molecular association of Glucose-6-phosphate isomerase and Pyruvate kinase M2 with Glyceraldehyde-3-phosphate dehydrogenase in cancer cells*

Mahua R Das<sup>1#</sup>, Arup K Bag<sup>2#</sup>, Shekhar Saha<sup>1</sup>, Alok Ghosh<sup>3</sup>, Sumit K Dey<sup>1</sup>, Provas Das<sup>1</sup>, Chitra Mandal<sup>2</sup>, Subhankar Ray<sup>4</sup>, Saikat Chakrabarti<sup>\*5</sup>, Manju Ray<sup>\*6</sup> and Siddhartha S Jana<sup>\*1</sup>

#### **Supplemental Methods:**

##### **Purification of GAPDH complex from EAC cells**

GAPDH was purified from EAC cells based on its enzymatic activity which was checked after each step of purification as described previously [1]. Briefly, 30-35 grams of frozen EAC cells were homogenized in 50 mM triethanolamine-HCl buffer, pH 7.4 containing 10 mM EDTA and 10mM 2-mercaptoethanol, (referred as 'buffer A/working buffer'). The supernatant was subjected to (NH<sub>4</sub>)<sub>2</sub>SO<sub>4</sub> fractionation steps followed by Sephacryl S-200, Sephadex G-100 (Pharmacia Fine Chemicals, Uppsala, Sweden) gel filtration columns and DEAE-Sephacell (Sigma-Aldrich, St. Louis, Missouri, USA) anion-exchange column. Enzyme fractions with high specific activity were collected and concentrated through a Amicon Ultra Centrifugal Filter Device (Ultracel-50K, Millipore Corporation, Billerica, MA, USA) and stored at -20<sup>0</sup>C with preservatives for further studies.

##### **PK assay**

Pyruvate kinase (PK) catalyzes the transfer of a phosphate group from phosphoenolpyruvate (PEP) to ADP, yielding one molecule of pyruvate and one molecule of ATP. Pyruvate kinase of muscle type (PKM) has two isoforms, like PKM1 and PKM2. The enzymatic activity of both isoforms (PKM1/2) can be measured by lactate dehydrogenase (LDH) linked couple reaction where pyruvate which is produced by PKM1/2 is converted into lactate by LDH, with a concomitant oxidation of NADH to NAD<sup>+</sup>, resulting in a decrease in absorbance at 340 nm [2]. Briefly, mouse tissues (normal mice muscle and 3MC induced sarcoma) and EAC cells extracts were prepared by modified HEPES buffer (50 mM HEPES-NaOH buffer of pH 8.0, 150 mM sodium chloride, 1.0% Nonidet P-40, 4 mM EDTA of pH 8.0 with freshly prepared 1 mM dithiothreitol, 0.5 mM phenylmethylsulfonyl fluoride and 1% protease inhibitor cocktails at 4<sup>0</sup>C). 1 ml of assay mixture contained 10 mM HEPES-NaOH buffer of

pH 7.5, 10 mM MgCl<sub>2</sub>, 50mM KCl, 2 mM ADP, 1 mM PEP, 0.5 mM NADH and 0.25 unit of LDH. The reaction was started by the addition of equal amount of protein containing tissue extracts or EAC cell extract. The reaction was monitored by observing decreased in absorbance at 340 nm due to the formation of NAD<sup>+</sup> from NADH which was noted at 30<sup>-s</sup> intervals for 2-3 min. The enzyme activity was calculated with E<sub>mM</sub> = 6.22 for NADH.

### **Circular dichroism spectrometry**

Secondary structure analysis of purified protein complex from EAC cells in the presence of MG was performed by far-UV (185-260 nm) CD in a Jasco J815 spectrophotometer at 25<sup>0</sup>C in 1mM triethanolamine-HCl buffer, pH 7.4 containing 0.2 mM EDTA and 0.2 mM 2-mercaptoethanol using a 0.1 cm path length quartz cuvette [3]. 15 µg of purified protein complex was incubated with MG at different concentration, 0-10 mM, at 25<sup>0</sup>C for 6h. CD spectra of the buffer was recorded and subtracted from the protein complex spectra. Each spectra line was plotted by considering the average value of three independent scans.

Table S1: List of proteins detected by mass spectroscopy analysis of band 1 of Fig. 1A.

| Sr. No. | Identified Protein                                                                                  | Accession No. | Mascot Score |
|---------|-----------------------------------------------------------------------------------------------------|---------------|--------------|
| 1       | Pyruvate kinase, isozyme M2 (EC 2.7.1.40).- Mus musculus (Mouse)                                    | KPYM_MOUSE    | <b>185</b>   |
| 2       | Pyruvate kinase muscle isozyme [Mus musculus]                                                       | CAA65761      | 184          |
| 3       | pyruvate kinase (EC 2.7.1.40) isozyme M2 - mouse                                                    | S55921        | 177          |
| 4       | Mus musculus 15 days embryo embryonic body below diaphragm cDNA, RIKEN full-length enriched library | Q9CRL6_MOUSE  | 41           |
| 5       | Putative uncharacterized protein                                                                    | Q9CSL2_MOUSE  | 38           |
| 6       | Mus musculus adult female placenta cDNA, RIKEN full-length enriched library, clone:1600012K10 produ | Q9DAY3_MOUSE  | 34           |
| 7       | Mus musculus 12 days embryo spinal cord cDNA, RIKEN full-length enriched library, clone:C530028K14  | Q8BUQ3_MOUSE  | 34           |
| 8       | Putative uncharacterized protein                                                                    | Q9CTZ9_MOUSE  | 34           |
| 9       | anti-meningococcal group C mAb C2/1076.10 immunoglobulin heavy chain [Mus musculus]                 | AAS47024      | 33           |
| 10      | Immunoglobulin heavy chain VDJ region                                                               | CAC29010      | 30           |
| 11      | Mus musculus 13 days embryo male testis cDNA, RIKEN full-length enriched library, clone:6030445D17  | Q8CD43_MOUSE  | 29           |
| 12      | Dendritic cell immunoreceptor (Mus musculus 0 day neonate cerebellum cDNA, RIKEN full-length enrich | Q9QZ15_MOUSE  | 29           |
| 13      | Smuckler.- Mus musculus (Mouse).                                                                    | Q6U7R4_MOUSE  | 28           |
| 14      | T-cell immunoglobulin and mucin domain containing 4 Mus musculus (Mouse)                            | Q8CIC7_MOUSE  | 27           |
| 15      | LOC210583 protein (Fragment).- Mus musculus (Mouse).                                                | Q6PFY2_MOUSE  | 26           |

Table S2: List of proteins detected by mass spectroscopy analysis of band 2 of Fig. 1A

| Sr. No. | Identified Protein                                                                                  | Accession No. | Mascot Score |
|---------|-----------------------------------------------------------------------------------------------------|---------------|--------------|
| 1       | Glucose-6-phosphate isomerase (EC 5.3.1.9) (GPI) (Phosphoglucose isomerase) (PGI)                   | G6PI_MOUSE    | <b>531</b>   |
| 2       | Glucose-6-phosphate isomerase (EC 5.3.1.9) – mouse                                                  | NUMS          | 528          |
| 3       | Glucose phosphate isomerase 1.- Mus musculus (Mouse)                                                | Q5RJI3_MOUSE  | 497          |
| 4       | Phosphoglucose isomerase-2 (EC 5.3.1.9)                                                             | Q8C675_MOUSE  | 491          |
| 5       | Glucose phosphate isomerase, partial [Mus musculus]                                                 | AAA65641      | 233          |
| 6       | Structural glucose phosphate isomerase 1 (EC 5.3.1.9) (Fragment).- Mus musculus (Mouse)             | Q9JM07_MOUSE  | 63           |
| 7       | Jak 1 protein                                                                                       | Q8K0I7_MOUSE  | 46           |
| 8       | unnamed protein product [Mus musculus]                                                              | Q8K0I7_MOUSE  | 42           |
| 9       | JAK1 protein tyrosine kinase [Mus sp.]                                                              | AAB27517      | 40           |
| 10      | RAC-alpha serine/threonine-protein kinase                                                           | AAA18254      | 39           |
| 11      | protein kinase (EC 2.7.1.37) akt1 [similarity] - mouse                                              | S33364        | 38           |
| 12      | E230022H04Rik protein (RIKEN cDNA E230022H04 gene).- Mus musculus (Mouse)                           | Q8JZZ6_MOUSE  | 38           |
| 13      | MUSHEXOKB NID: - Mus musculus                                                                       | AAB57759      | 37           |
| 14      | Mus musculus 8 days embryo whole body cDNA, RIKEN full-length enriched library, clone:5730420D13 pr | Q9CYK5_MOUSE  | 37           |
| 15      | Dock9 protein.- Mus musculus (Mouse)                                                                | Q6PF84_MOUSE  | 37           |

Table S3: List of proteins detected by mass spectroscopy analysis of band 3 of Fig. 1A.

| Sr. No. | Identified Protein                                                                      | Accession No. | Mascot Score |
|---------|-----------------------------------------------------------------------------------------|---------------|--------------|
| 1       | Glyceraldehyde-3-phosphate dehydrogenase (phosphorylating) (EC 1.2.1.12) - mouse        | DEMSG         | <b>273</b>   |
| 2       | Glyceraldehyde-3-phosphate dehydrogenase (EC 1.2.1.12) (GAPDH).- Mus musculus (Mouse).  | G3P_MOUSE     | 272          |
| 3       | Similar to glyceraldehyde-3-phosphate dehydrogenase.- Mus musculus (Mouse).             | Q5U410_MOUSE  | 265          |
| 4       | Glyceraldehyde-3-phosphate dehydrogenase (Phosphorylating)-like.- Mus musculus (Mouse)  | Q6P287_MOUSE  | 175          |
| 5       | Glyceraldehyde 3-phosphate dehydrogenase [Mus musculus]                                 | AAA80276      | 43           |
| 6       | unnamed protein product [Mus musculus]                                                  | BAB24222      | 35           |
| 7       | Immunoglobulin heavy chain VDJ region                                                   | AAO59753      | 28           |
| 8       | Putative uncharacterized protein [Mus musculus]                                         | Q9D357_MOUSE  | 27           |
| 9       | Hypothetical Protein                                                                    | Q8R1N6_MOUSE  | 27           |
| 10      | Immunoglobulin heavy chain VDJ region                                                   | AAO59739      | 27           |
| 11      | Hypothetical protein.- Mus musculus (Mouse)                                             | Q6P0X2_MOUSE  | 26           |
| 12      | CQ871272 NID: - Mus musculus                                                            | CAH56817      | 26           |
| 13      | Ig heavy chain V region (M-T408) - mouse (fragment)                                     | S19968        | 26           |
| 14      | ALPHA CD4 MAB IMMUNOGLOBULIN HEAVY CHAIN - VDJ REGION (FRAGMENT).- Mus musculus (Mouse) | CAA46217      | 26           |
| 15      | MHC class Ib antigen Qa-1c.- Mus musculus (Mouse).                                      | O98032_MOUSE  | 25           |

Table S4: Chemical identification and molecular localization of MAGE in PKM2 by MALDI-TOF analysis. Glycated residue is shown in **bold**.

| Identified protein | Observed mass (Da) | Theoretical mass (Da) | Observed mass of glycated peptide (Da) | Peptide sequence            | Mass Increase (Da) | Type of MAGE     | Glycated residue |
|--------------------|--------------------|-----------------------|----------------------------------------|-----------------------------|--------------------|------------------|------------------|
| PKM2 Untreated     | 2087.9417          | 2088.0872             | Nil                                    | EAEAAIYHLQLFEELRR (384-400) | —                  | —                | —                |
| PKM2 Treated       | 2087.9597          | 2088.0872             | 2141.9580                              | EAEAAIYHLQLFEELRR (384-400) | 54                 | Hydroimidazolone | R399             |

### Figure Legends

**Fig. S1.** Purification of glyceraldehydes-3-phosphate dehydrogenase (GAPDH) from EAC cells. (A) 6<sup>th</sup> step of glycolysis. (B) GAPDH activity after each step of purification. Specific activity was measured as units of activity present per mg of protein. Fold was calculated considering the specific activity of crude extract as “1”. Results are expressed as means  $\pm$  SD from six independent experiments. (C-E), The amino acid sequence of PKM2 (C), GPI (D) and GAPDH (E) show 21%, 45% and 24% sequence coverage respectively. Matched peptides are shown in bold red.

**Fig. S2.** Tissue extract from normal and 3MC induced tumor were probed with PKM1 (from Proteintech Group) and  $\beta$ -tubulin antibodies. Tubulin was used as loading control for samples. Note that PKM1 is absent in tumor tissue.

**Fig. S3.** (A) Supernatant and pellet of GAPDH -IP reaction were run along with whole tissue extract and probed with PKM2, GPI, and GAPDH antibodies. (B) Quantification of immunoblots. % of protein in the supernatant was calculated following the equation;  $\{[S]/[S]+[P]\} \times 100$ . [S] and [P] indicate the intensity of a band in supernatant and pellet, respectively. Results are expressed as means  $\pm$  SD from three independent experiments.

**Fig. S4:** Panel A provides the average occurrence frequencies of C terminal, N terminal , and both of GAPDH and PKM2 proteins at the interface observed within the 30 top scoring docking complexes obtained from three different programs whereas panels B (GAPDH) and C (PKM2) provides the occurrence frequency of each residue within the GAPDH-PKM2 docking complexes. Panels D-F represent similar domain and residue occurrence frequencies observed within the GAPDH-GPI docking complexes. An interface is regarded as C or N terminal interface if 60% of the interface residues for each protein reside within C or N termini, respectively.

**Fig. S5.** (A) Enzymatic activity of PK in the extracts of normal, 3MC induced tumor tissues, and EAC cells. Note that PK activity was low in tumor cells. Results are expressed as mean  $\pm$  SD from three independent experiments. \*\*,  $p < 0.01$  for normal vs 3MC or EAC (B) Extract of 3MC induced tumor tissue was treated with 1mM MG or vehicle for 6 h at room temperature followed by incubation with antibody against GAPDH overnight at 4<sup>0</sup>C. Immunoprecipitate was probed with antibodies against PKM2 (panel 1), GPI (panel 2), GAPDH (panel 3) or IgG (panel 4). Note that both GPI and PKM2 were detectable in the immunoprecipitate of GAPDH antibody in the presence of MG. (C) The circular dichroism spectroscopy of purified GAPDH protein complex from EAC cell in absence (black) and in presence of 0.5-10 mM MG at 25<sup>0</sup>C for 6h. (D) Quantification of % of change in helicity. % was calculated following the equation:  $\{[\theta]_{\text{vehicle}} - [\theta]_{\text{sample}} / [\theta]_{\text{vehicle}}\} \times 100$ . Note that change in helicity both at 208 and 222 nm increases with increasing the concentration of MG.

**Fig. S6.** Glycation in GAPDH and GPI in presence of MG. Purified protein complex from EAC was treated with 1mM MG for 5 days at room temperature. Samples treated or untreated with MG were run on 7.5-15% SDS PAGE gel followed by mass spectroscopy analysis for GAPDH (A) and GPI (B). An unidentified peak is shown with arrow in (A).

## References

1. Bagui S, Ray M and Ray S (1999) Glyceraldehyde-3-phosphate dehydrogenase from Ehrlich ascites carcinoma cells. Its possible role in the high glycolysis of malignant cells. *Eur J Biochem* **262**, 386-395.
2. Chern CJ, Rittenberg MB and Black JA (1972) Purification of Human Erythrocyte Pyruvate kinase. *J Biol Chem* **247**, 7173-7180.
3. Ghosh S, Ray M, Das MR, Chakrabarti A, Khan AH, Sarma DD, Acharya S (2014) Modulation of glyceraldehyde-3-phosphate dehydrogenase activity by surface functionalized quantum dots. *Phys Chem Chem Phys* **16**, 5276-83.

A

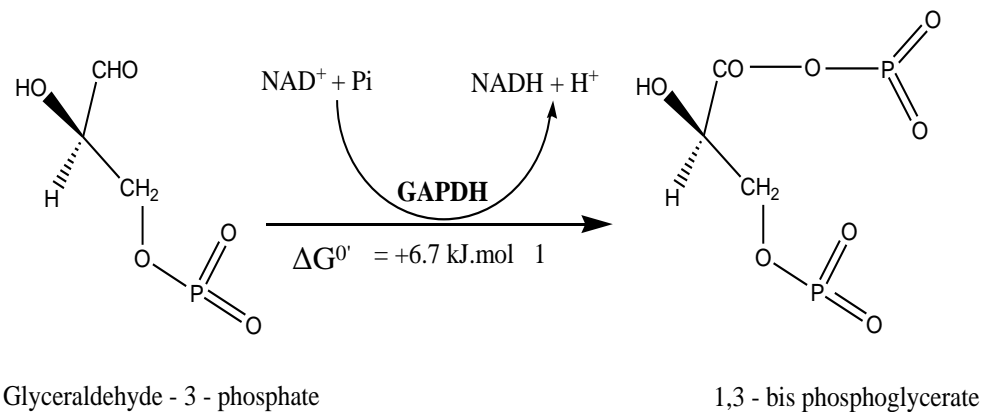

B

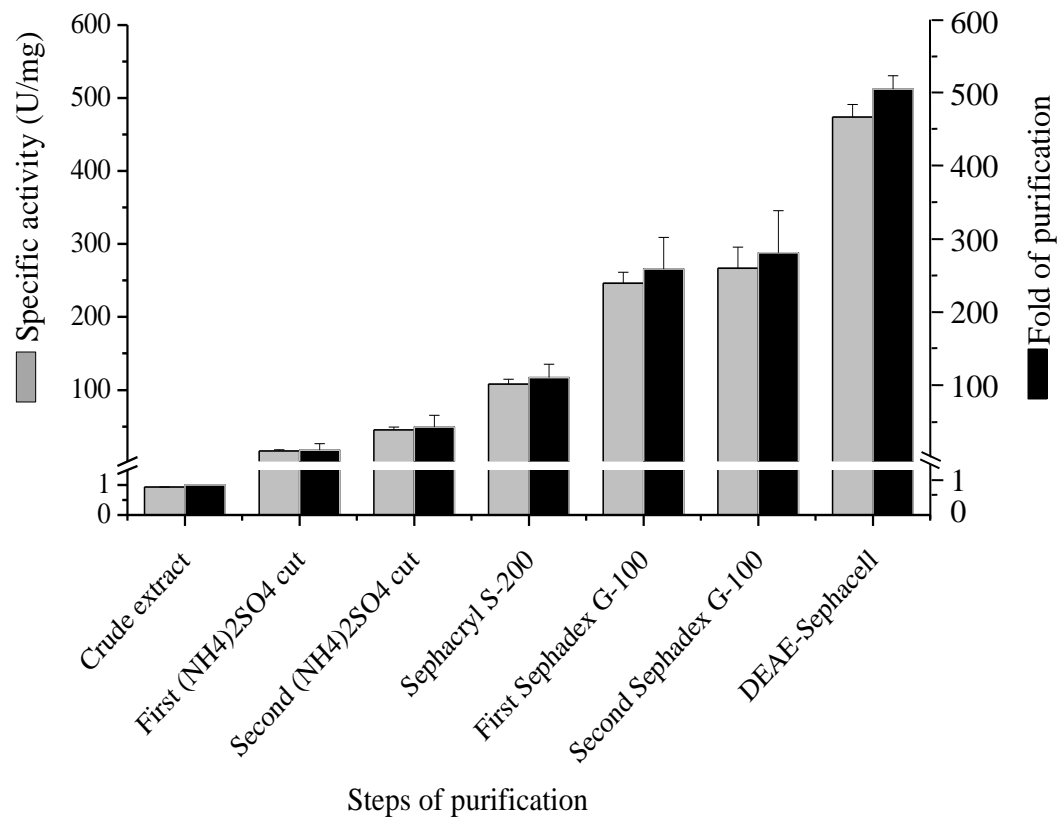

Fig.S1

| C   |                    | Sequence analysis of mouse PKM2  |                    | Sequence Coverage: 21% |                    |
|-----|--------------------|----------------------------------|--------------------|------------------------|--------------------|
| 1   | PKPHSEAGTA         | FIQTQQLHAA                       | MADTFLEHMC         | <b>RLDIDSAPIT</b>      | <b>ARNTGICTI</b>   |
| 51  | <b>GPASR</b> SVEML | KEMIKSGMNV                       | ARLNFSHGTH         | EYHAETIKNV             | REATESFAD          |
| 101 | PILYRPVAVA         | LDTKGPEIRT                       | GLIKGSGTAE         | VELKKGATLK             | <b>ITLDNAYMEK</b>  |
| 151 | <b>CDENILWLDY</b>  | <b>KNICKVVEVG</b>                | SKIYVDDGLI         | SLQVKEKGAD             | FLVTEVENGG         |
| 201 | SLGSKKGVNL         | PGAAVDLPVAV                      | SEKDIQDLKF         | <b>GVEQDVDMVF</b>      | <b>ASFIRKAADV</b>  |
| 251 | <b>HEVRK</b> VLGEK | GKNIKIISKI                       | <b>ENHEGVRREFD</b> | <b>EILEASDGIM</b>      | <b>VARGDLGIEI</b>  |
| 301 | PAEKVFLAQK         | MMIGRCNRAG                       | KPVICSTQML         | EIMIKKPRPT             | RAEGSDVANA         |
| 351 | VLDGADCIML         | SGETAK <b>GDYP</b>               | <b>LEAVRMQHLI</b>  | AREAEAAIYH             | LQLFEELRRL         |
| 401 | APITSDPTEA         | AAVGAVEASF                       | KCCSGAIIVL         | TKSGR <b>SAHQV</b>     | <b>ARYRPRAPII</b>  |
| 451 | AVTRNPQTAR         | QAHLYRGIFP                       | VLCKDAVLNA         | WAEDVDLRVN             | LAMDVVGKARG        |
| 501 | FFKKGDVVIV         | LTGWRPGSGF                       | TNTMRVVPVP         |                        |                    |
| D   |                    | Sequence analysis of mouse GPI   |                    | Sequence Coverage: 45% |                    |
| 1   | AALTRNPQFQ         | KLLEWHRANS                       | ANLKL <b>RELFE</b> | <b>ADPERFNNFS</b>      | LNLNTNHGHI         |
| 51  | LVDYSKNLVN         | <b>KEVMQMLVEL</b>                | <b>AKSRGVEAAR</b>  | <b>DNMFSGSKIN</b>      | <b>YTEDRAVLHV</b>  |
| 101 | <b>ALRNR</b> SNTPI | <b>KVDGKDVMP</b> E               | <b>VNR</b> VLDKMKS | FCQVRVSGDW             | KGYTGKSITD         |
| 151 | IINIGIGGSD         | LGPLMVTEAL                       | KPYSKGGPR <b>V</b> | <b>WFVSNIDGTH</b>      | <b>IAKTLASLSP</b>  |
| 201 | ETSLFIIASK         | TFTTQETITN                       | AETAK <b>EWFE</b>  | <b>AAKDPSAVAK</b>      | <b>HFVALSTNTA</b>  |
| 251 | <b>KVKEFGIDPQ</b>  | <b>NMFEFWDWVG</b>                | <b>GRYSLWSAIG</b>  | LSIALHVGFD             | HFEQLLSGAH         |
| 301 | WMDQHFLKTP         | LEK <b>NAPVLLA</b>               | <b>LLGIWYINCY</b>  | <b>GCETHALLPY</b>      | <b>DQYMHRFAAY</b>  |
| 351 | <b>FQQGDMESNG</b>  | <b>KYITKSGARV</b>                | <b>DHQTGPIVWG</b>  | <b>EPGTNGQHAF</b>      | <b>YQLIHQGTKM</b>  |
| 401 | <b>IPCDFLIPVQ</b>  | <b>TQHPIRKGLH</b>                | <b>HKILLANFLA</b>  | <b>QTEALMKGKL</b>      | PEEARKELQA         |
| 451 | AGKSPEDLEK         | LLPHK <b>VFEGN</b>               | <b>RPTNSIVFTK</b>  | <b>LTPFILGALI</b>      | <b>AMYEHKIFVQ</b>  |
| 501 | GIMWDINSFD         | QWGVELGKQL                       | AKKIEPELEG         | SSAVTSHDSS             | TNGLISFIKQ         |
| 551 | QRDTKLE            |                                  |                    |                        |                    |
| E   |                    | Sequence analysis of mouse GAPDH |                    | Sequence Coverage: 24% |                    |
| 1   | MVKVGVNGFG         | RIGRLVTRAA                       | ICSGKVEIVA         | INDPFIDLNY             | MVYMFQYDST         |
| 51  | HGKFNGTVKA         | ENGK <b>LIVINGK</b>              | <b>PITIFQERDP</b>  | <b>TNIKWGEAGA</b>      | EYVVESTGVF         |
| 101 | TTMEKAG AHL        | KGGAK <b>RVIIS</b>               | <b>APSADAPMFV</b>  | <b>MGVNHEK</b> YDN     | SLKIVSNASC         |
| 151 | TTNCLAPLAK         | VIHDNFGIVE                       | GLMTTVHAIT         | ATQK <b>TVDGPS</b>     | <b>GKLWRDGRGA</b>  |
| 201 | AQNIIPASTG         | AAKAVGKVIP                       | ELNGKLTGMA         | FR <b>VPTPNVSV</b>     | <b>VDLTCR</b> LEKP |
| 251 | AKYDDIKKVV         | KQASEGPLKG                       | ILGYTEDQVV         | SCDFNSNSHS             | STFDAGAGIA         |
| 301 | LNDNFVK <b>LIS</b> | <b>WYDNEYGYSN</b>                | <b>RVVDLMAYMA</b>  | SKE                    |                    |

Fig.S1

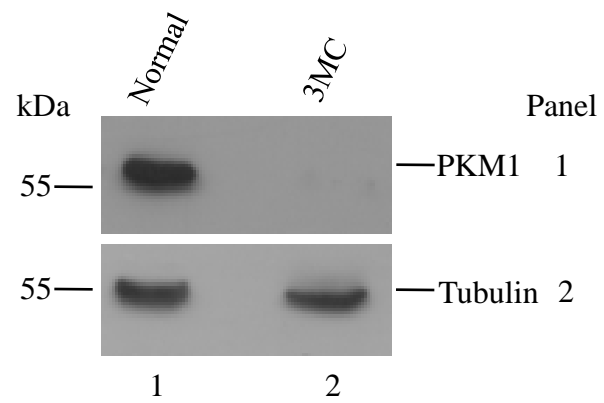

Fig.S2

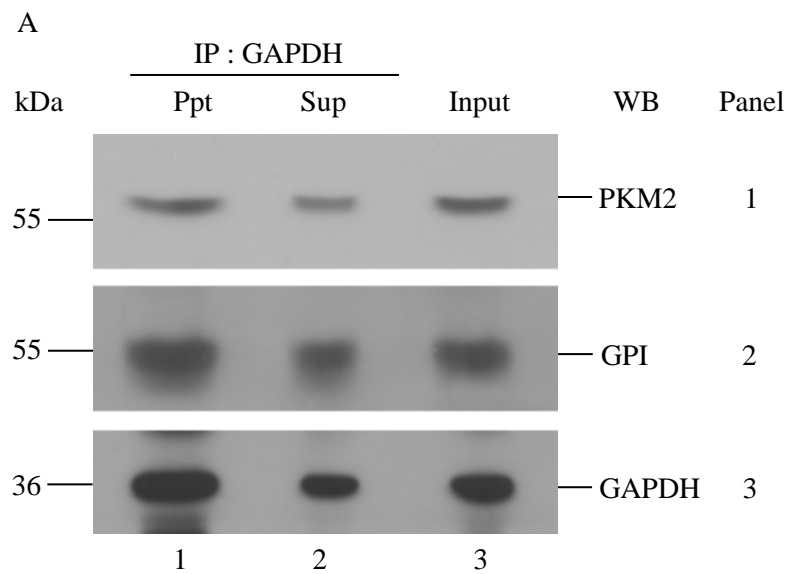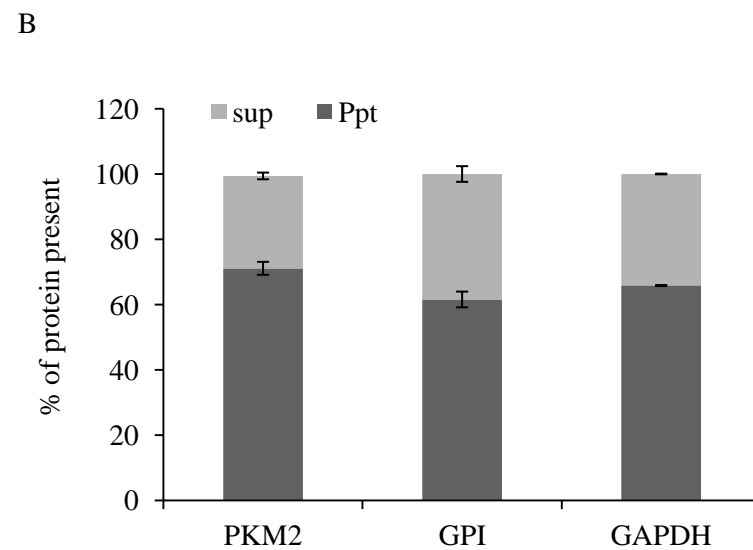

Fig.S3

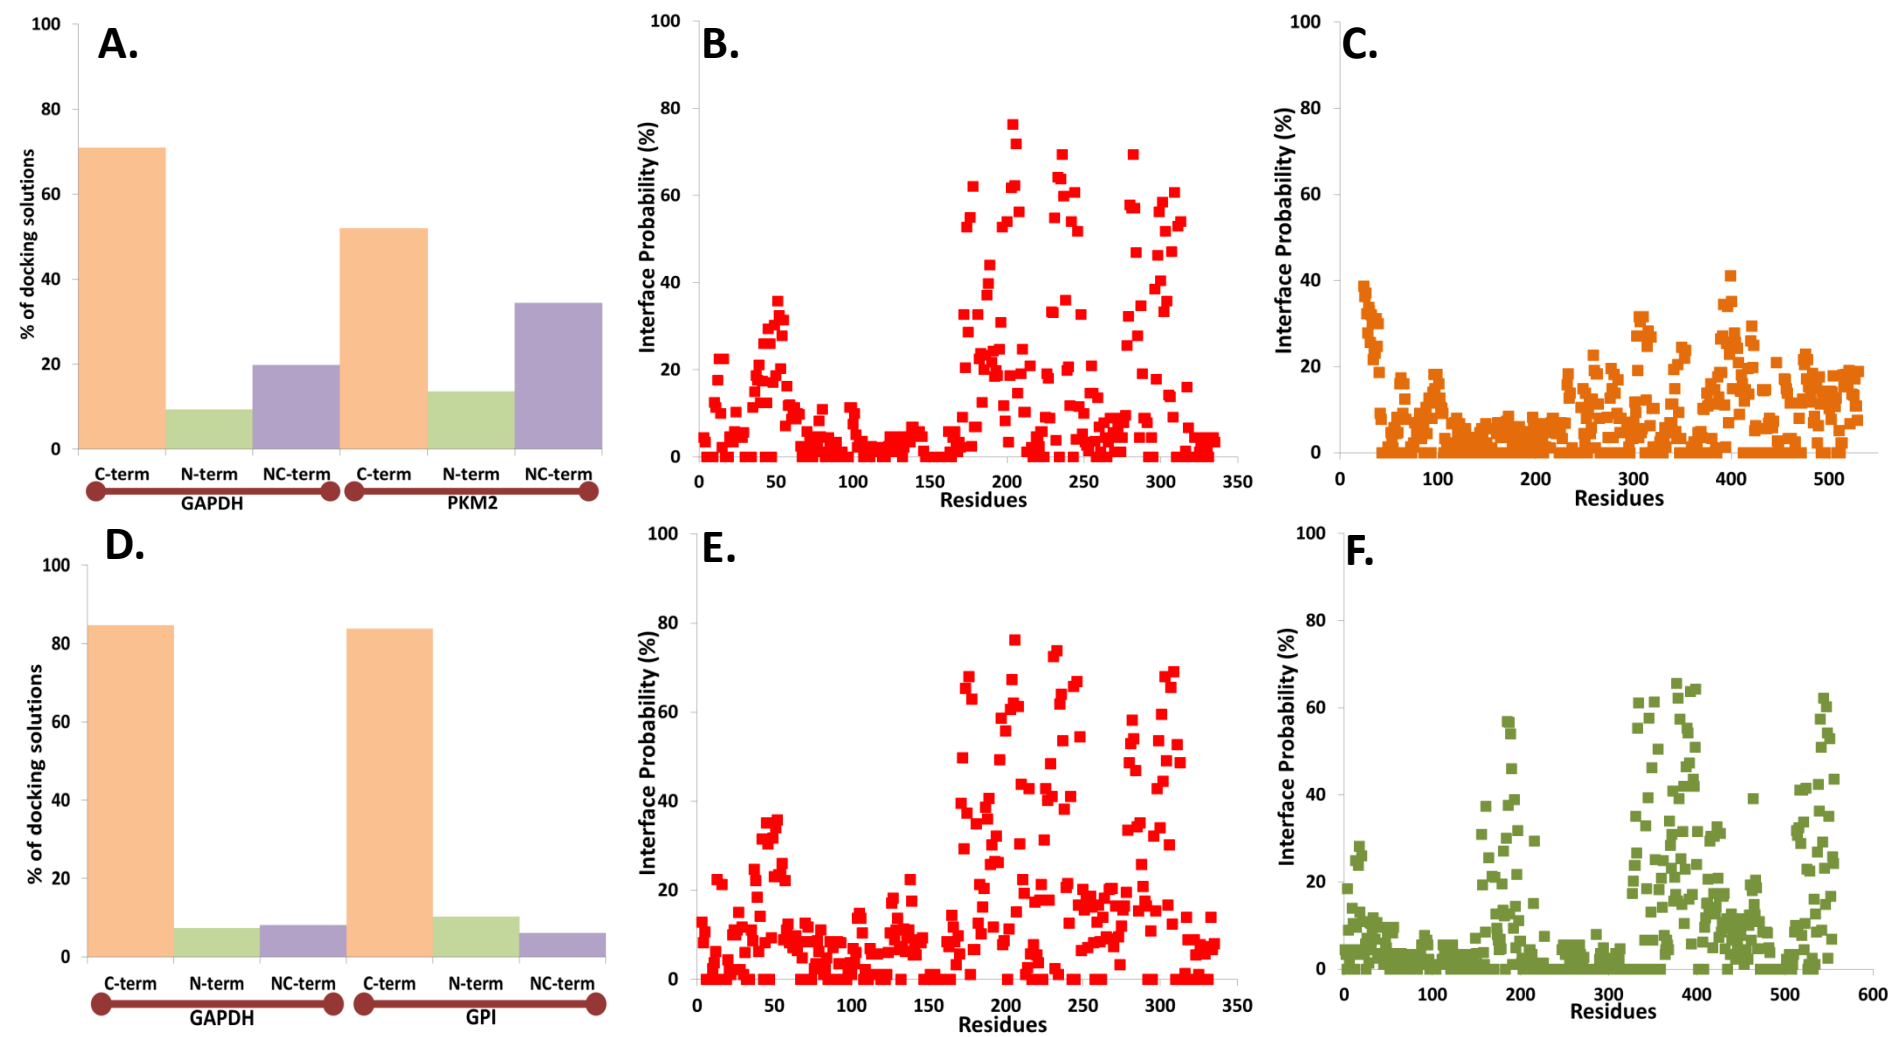

Fig.S4

A

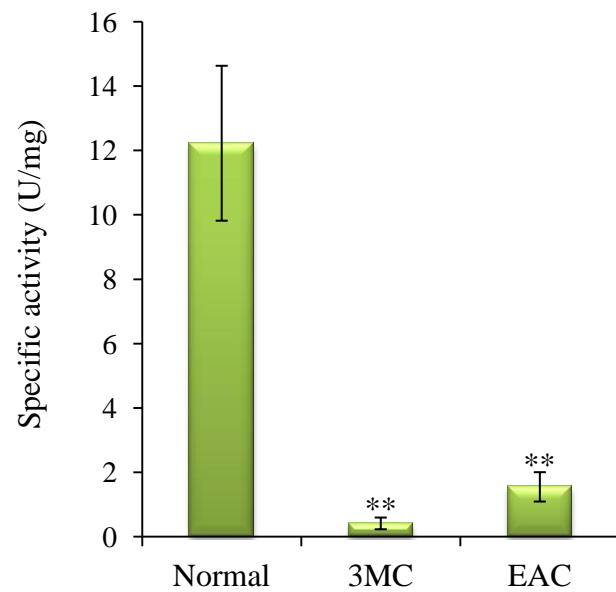

B

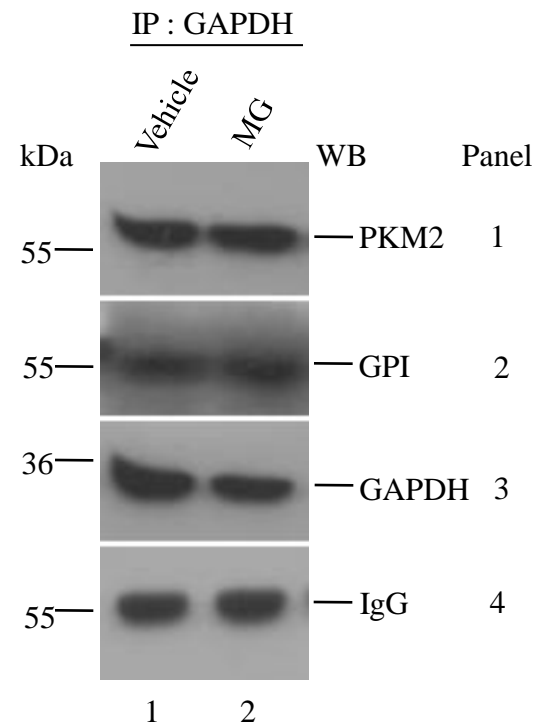

C

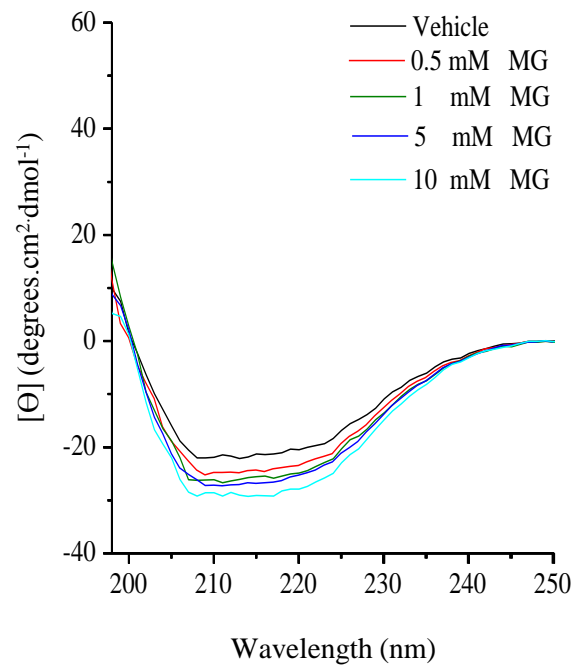

D

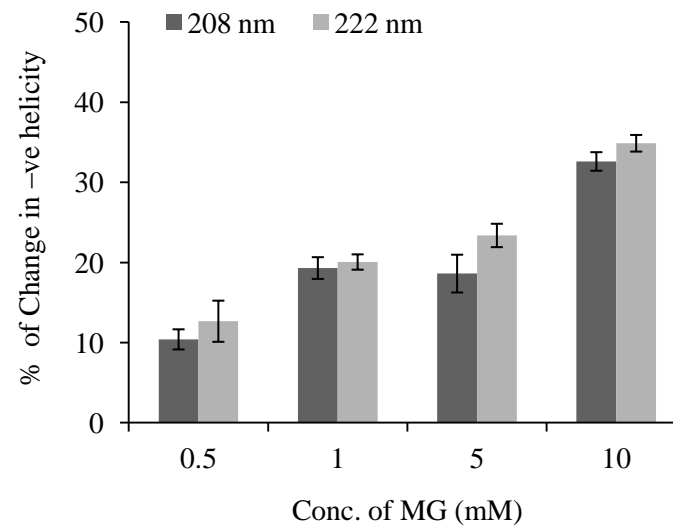

Fig.S5

A

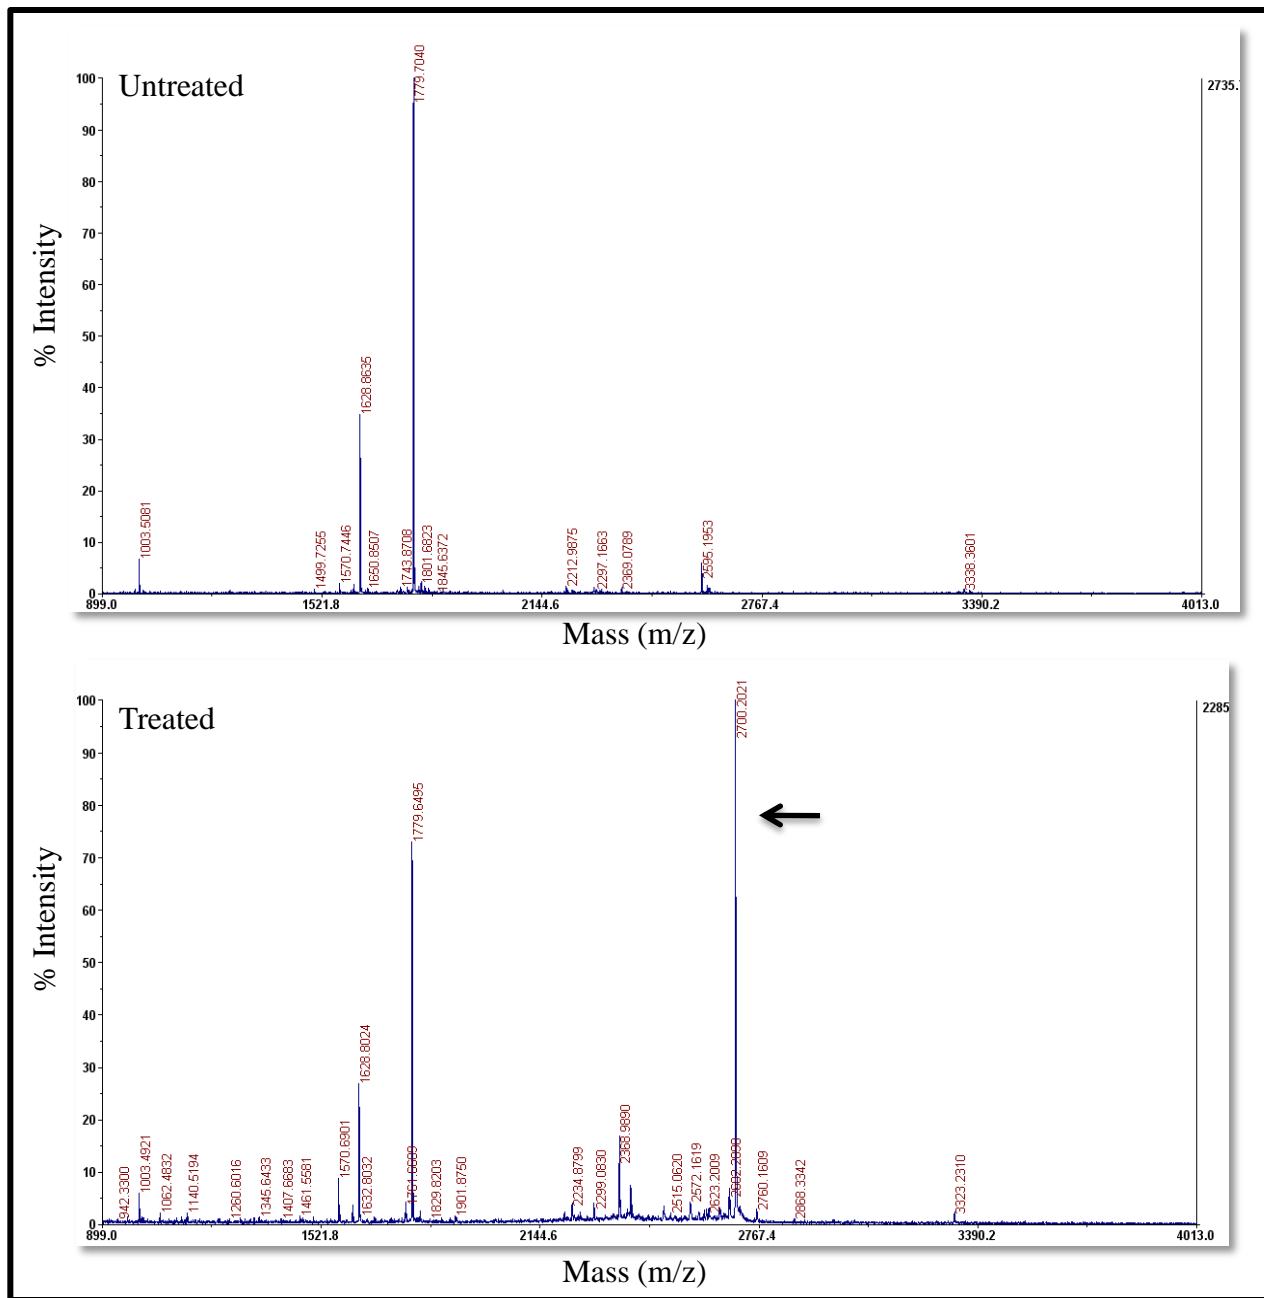

GAPDH

Fig.S6

B

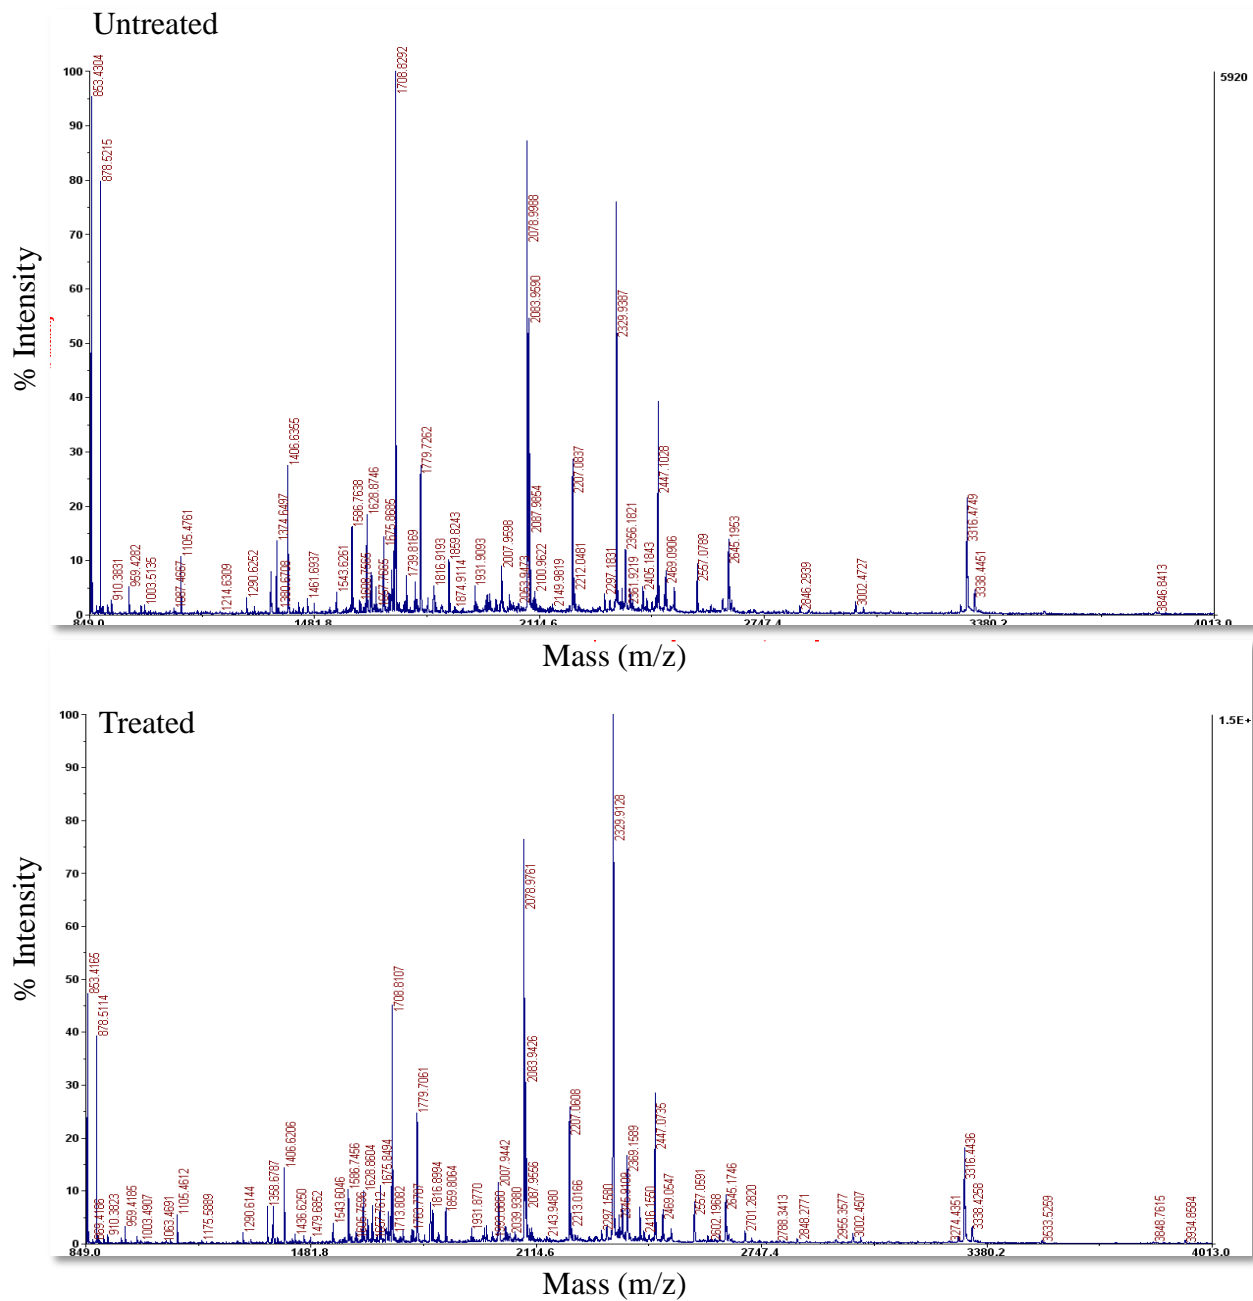

GPI

Fig.S6
